# Supplementary material for: Rational Constructed Ultra-Small Iron Oxide Nanoprobes Manifesting High Performance for T1-Weighted Magnetic Resonance Imaging of Glioblastoma
Source: Nanomaterials (Basel). 2021 Oct 2;11(10):2601. doi: 10.3390/nano11102601 (PMC8540453; doi:10.3390/nano11102601)
Supplement: Supplementary file 1 [file nanomaterials-11-02601-s001.zip › nanomaterials-1390826-supplementary.pdf]

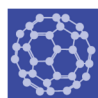

## Supplementary Materials

# Rational Constructed Ultra-Small Iron Oxide Nanoprobes Manifesting High Performance for $T_1$ -weighted Magnetic Resonance Imaging of Glioblastoma

Xiangyan Wang <sup>1,2</sup>, Lei Chen <sup>2</sup>, Jianxian Ge <sup>2</sup>, Mohammad Javad Afshari <sup>2</sup>, Lei Yang <sup>1,2</sup>, Qingqing Miao <sup>2</sup>, Ruixue Duan <sup>2</sup>, Jiabin Cui <sup>2</sup>, Chunyi Liu <sup>2</sup>, Jianfeng Zeng <sup>2,\*</sup>, Jian Zhong <sup>1</sup> and Mingyuan Gao <sup>1,2,\*</sup>

<sup>1</sup> College of Food Science & Technology, Shanghai Ocean University, Shanghai 201306, China; wxyxjq@163.com (X.W.); keirayang18@163.com (L.Y.); jzhong@shou.edu.cn (J.Z.)

<sup>2</sup> Center for Molecular Imaging and Nuclear Medicine, State Key Laboratory of Radiation Medicine and Protection, School for Radiological and Interdisciplinary Sciences (RAD-X), Collaborative Innovation Center of Radiological Medicine of Jiangsu Higher Education Institutions, Soochow University, Suzhou 215123, China; chenlei199303@gmail.com (L.C.); jxge@stu.suda.edu.cn (J.G.); moja.afshari@gmail.com (M.J.A.); qqmiao@suda.edu.cn (Q.M.); rxduan@suda.edu.cn (R.D.); jiabin.cui@suda.edu.cn (J.C.); cyliu19@suda.edu.cn (C.L.)

\* Correspondence: jfzeng@suda.edu.cn (J.Z.); gaomy@iccas.ac.cn (M.G.)

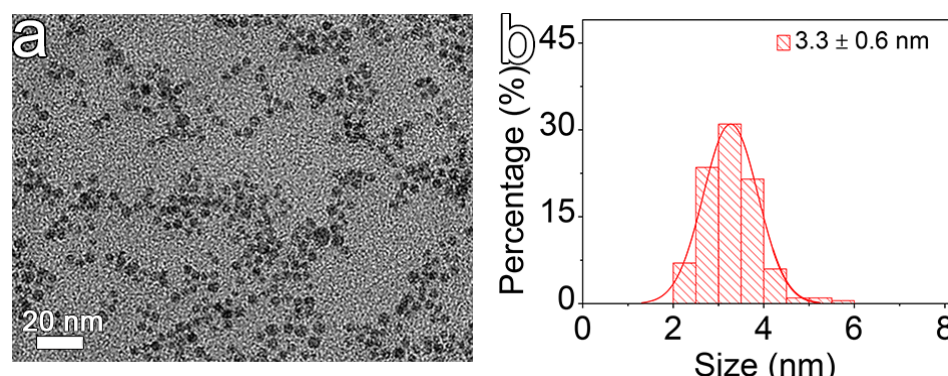

Figure S1. TEM (a) and graphical representation (b) of  $\text{Fe}_3\text{O}_4$ -Mal NPs.

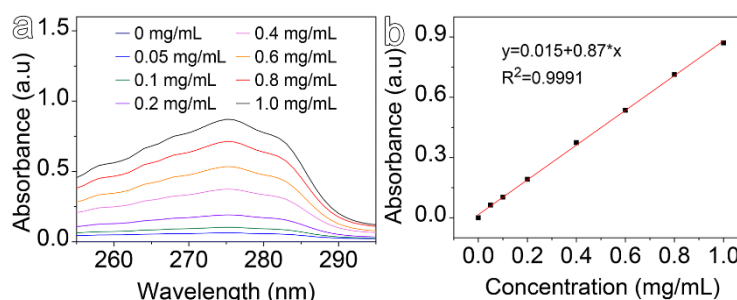

Figure S2. Standard curve of ANG. (a) The absorption curve of ANG at different concentrations of 0, 0.05, 0.1, 0.2, 0.4, 0.6, 0.8, 1.0  $\text{mg mL}^{-1}$ . (b) According to the absorbance of different concentrations of ANG at 275 nm, the standard curve is obtained by fitting a linear equation.

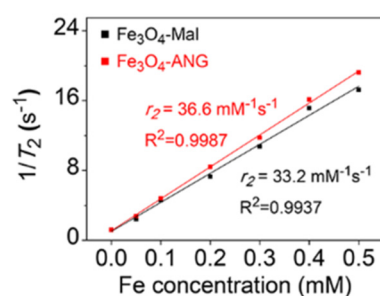

**Figure S3.** Linear regression fitting of the relaxivity of  $\text{Fe}_3\text{O}_4$ -Mal and  $\text{Fe}_3\text{O}_4$ -ANG NPs for extracting the transverse relaxivity  $r_2$ .

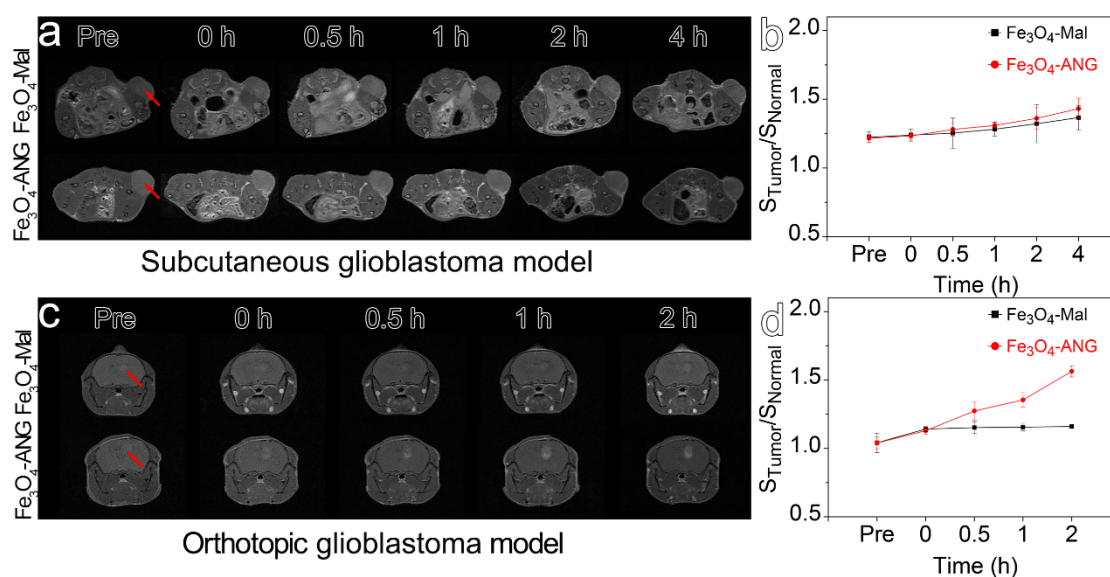

**Figure S4.** (a) MRI of the subcutaneous glioblastoma model within 4 h after injection of  $\text{Fe}_3\text{O}_4$ -Mal or  $\text{Fe}_3\text{O}_4$ -ANG NPs. (b) Tumor signal trends for the subcutaneous glioblastoma model after injection of  $\text{Fe}_3\text{O}_4$ -Mal or  $\text{Fe}_3\text{O}_4$ -ANG NPs. (c) MRI of the orthotopic glioblastoma model within 2 h after injection of  $\text{Fe}_3\text{O}_4$ -Mal or  $\text{Fe}_3\text{O}_4$ -ANG NPs. (d) Tumor signal trends for the orthotopic glioblastoma model after injection of  $\text{Fe}_3\text{O}_4$ -Mal or  $\text{Fe}_3\text{O}_4$ -ANG NPs.
